# Supplementary material for: Prevalence, Risk Factors, and Characterization of Multidrug Resistant and ESBL/AmpC Producing Escherichia coli in Healthy Horses in Quebec, Canada, in 2015–2016
Source: MDPI journal article supplement (doi:10.3390/ani10030523), 2020-03-20
Supplement: s1 [file s1]

## Multidrug resistance Horses Owner

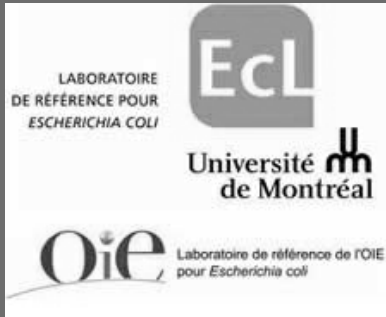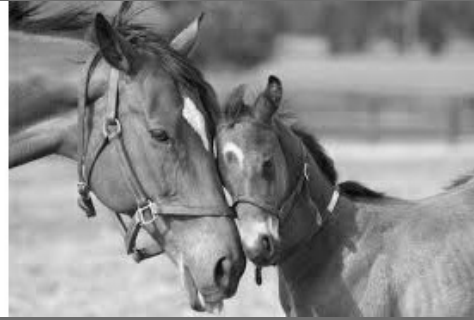

Project presentation : Multidrug resistance in horses in Canada

### Context:

**Multidrug resistance concerns equine medicine also!**

Equine practitioners have to face antimicrobial treatment failure more frequently. This jeopardizes equine health and raises questions concerning environmental contamination and transmission to horse handlers.

*Escherichia coli* is an intestinal bacterium, mainly harmless, although certain strains may become dangerous. It is widely found in the digestive tracts of all mammals, and is subject to selection pressure during every antimicrobial treatment even if not the targeted bacterial species. It is, therefore, a perfect candidate to become a reservoir of antimicrobial resistance.

One of the main resistance mechanisms of *E. coli* is  $\beta$ -lactamase production, resulting in the inhibition of an essential antimicrobial class, the  $\beta$ -lactams.

Ceftiofur (Excenel®) is a  $\beta$ -lactam. In Canada, resistance to ceftiofur has developed, due to its extensive use in the meat production industry. In equine medicine, ceftiofur is well tolerated and the new long acting product is very convenient for use in the field. This could facilitate resistance dissemination. Stakeholders in the Equine industry need to maintain the usefulness of this molecule.

Moreover, Ceftiofur resistance is of public health interest as it is responsible for cross resistance to ceftriaxone, the treatment of choice for a certain type of severe, sometimes fatal, diarrhea in children.

The objective of our study is to determine if the normal microflora of horses might represent a reservoir of resistance and play a role in persistence and transmission.

Such data will be useful to elaborate new adapted antimicrobial use guidelines, to improve equine health taking public health into account.

We thank you for your participation to this study. This survey may seem long, however it is very important that you take the time to fill it up with great attention, in order to get data as accurate as possible. Thus we will be able to interpret the results as thoroughly as possible.

If you have any remarks about the questions, or the available answers, please let us know, and we will bring the necessary corrections. Please send an e-mail to [maud.de.lagarde@umontreal.ca](mailto:maud.de.lagarde@umontreal.ca) with the object : survey e coli horse.

Once again : THANK YOU for your time !!!

## Multidrug resistance Horses Owner

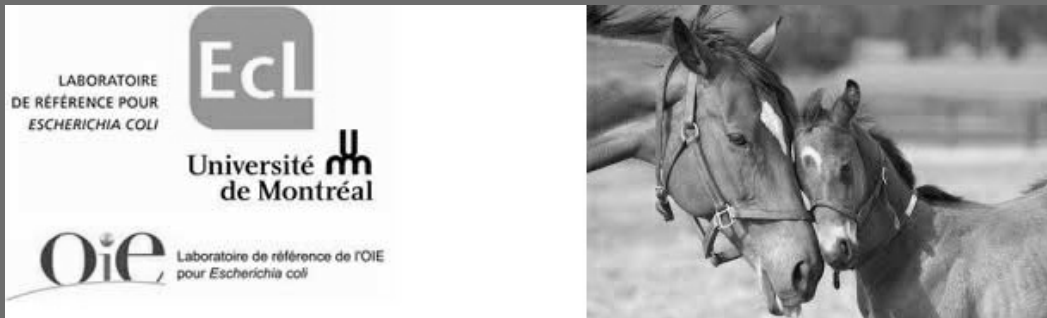

### Consent form

**Project's title : Prevalence of  $\beta$ -lactamase producing, and multi drug -resistant Escherichia coli AND evaluation of risk factors for fecal shedding of these isolates in the equine population in Canada.**

#### **Objectives :**

**Determine if the healthy equine population represents a reservoir of  $\beta$ -lactamase-producing and multidrug resistant E. coli.**

**Evaluate risk factors associated with fecal shedding of  $\beta$ -lactamase-producing or multidrug-resistant E. coli.**

**Provide an easily accessible and integrated tool to monitor antimicrobial resistance of clinical E. coli isolates from animals.**

#### **Manipulation :**

**Rectal swab sampling.**

#### **Risks and inconveniences for horses :**

**The sampling represents no risks or inconveniences for the horses.**

#### **Time of participation and withdrawal :**

**My animal's participation to this study is voluntary, and I can withdraw him/her anytime without harm.**

#### **Confidentiality :**

**The informations gathered during this study are confidential and will not be used to other ends.**

**The results will be communicated to the veterinarian who collected the sample, and may be used to be published in a scientific journal.**

**1. Consent : In the light of the above informations, I agree that my horse/mare participate to the present study.**

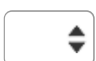

## Multidrug resistance Horses Owner

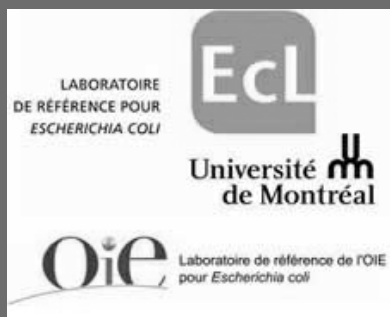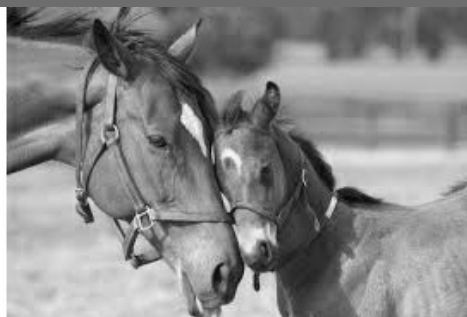

### Identification

#### 2. Owner adress

Name

Adress

Adress 2

city

State/Province

Zip code

Country

e-mail Adress

Phone

#### 3. Name of the horse (from now on, we will speak about horse regardless of the sex of your animal).

#### 4. Vet who has realised the sampling

Name

Zip Code

5. Treating vet (if different from the above)

Name

Zip Code

Téléphone

6. Have you been to a vet hospital within the last three months for personal reasons?

☐

no, not within the last three months

☐

yes, please specify how many times

7. Have you been to a human hospital within the last three months for professional reasons?

☐

no, not within the last three months

☐

yes, please specify how many times

8. Have you been to a human hospital for personal reasons, within the last three months

☐

no

☐

yes, please specify how many times

9. Have you been to a human hospital for professional reasons, within the last three months

☐

non

☐

yes, please specify how many times

10. Are you in contact with sick people in your job?

☐

no

☐

yes

11. Are you in contact with sick animals in your job?

☐ no

☐ yes, please specify the animal species

### Multidrug resistance Horses Owner

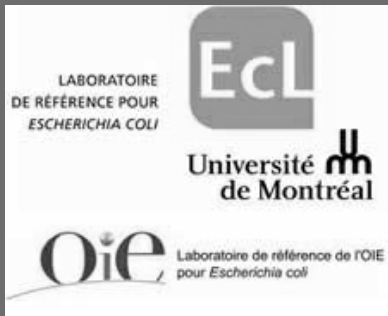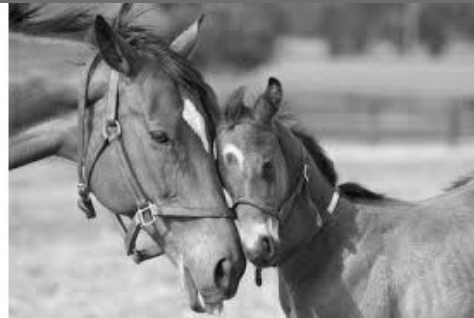

### Location

12. Stable address where your horse stay most of the time

Name

Society

Adress

Adress

City

State/Province

Zip Code

Country

Phone

### Multidrug resistance Horses Owner

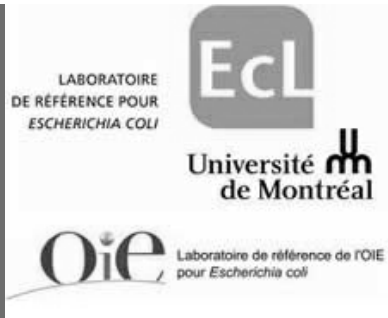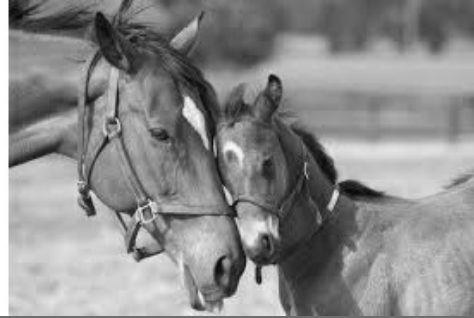

## Horse's Signalment

13. For how long have you owned your horse?

14. How old is your horse (in years)

15. What sex is your horse?

- ☐ Stallion
- ☐ Gelding
- ☐ Female
- ☐ Female castrated

16. What is your estimation of the weight of your horse

- ☐ less than 100kg (200lbs)
- ☐ between 100 and 400 kg (201 to 900 lbs)
- ☐ between 400 and 600 kg (901 to 1300) lbs
- ☐ more than 600 kg (1301lbs)

17. What is the breed of your horse

- ☐ Warmblood
- ☐ Quarter Horse and other
- ☐ Race (Standardbred or Thoroughbred)
- ☐ Draft Horse (Belgium, Clydesdale, Percheron)
- ☐ Canadian, Frisian
- ☐ Pony (including miniature horses)
- ☐ Cross breed (Appendix, etc...)
- ☐ Other, specify

18. What is the main activity of your horse

- ☐ Classical competition (jumper, dressage, cross-country , endurance (national level and above)
- ☐ Classical competition (jumper, dressage, cross-country, endurance (provincial level and below)
- ☐ Western competition (national level and above)
- ☐ Western competition (provincial level and below)
- ☐ Leisure horse
- ☐ School horse
- ☐ Race
- ☐ Carriage
- ☐ Reproduction
- ☐ Not at work
- ☐ Other, specify

19. Did your horse take part to equestrian events within the last three months?

- ☐ no
- ☐ yes
- ☐ I do not know

20. If yes, please specify

|          | Location             | Date                 | Number of participant | Type of event        |
|----------|----------------------|----------------------|-----------------------|----------------------|
| Event 1  | <input type="text"/> | <input type="text"/> | <input type="text"/>  | <input type="text"/> |
| Event 2  | <input type="text"/> | <input type="text"/> | <input type="text"/>  | <input type="text"/> |
| Event 3  | <input type="text"/> | <input type="text"/> | <input type="text"/>  | <input type="text"/> |
| Event 4  | <input type="text"/> | <input type="text"/> | <input type="text"/>  | <input type="text"/> |
| Event 5  | <input type="text"/> | <input type="text"/> | <input type="text"/>  | <input type="text"/> |
| Event 6  | <input type="text"/> | <input type="text"/> | <input type="text"/>  | <input type="text"/> |
| Event 7  | <input type="text"/> | <input type="text"/> | <input type="text"/>  | <input type="text"/> |
| Event 8  | <input type="text"/> | <input type="text"/> | <input type="text"/>  | <input type="text"/> |
| Event 9  | <input type="text"/> | <input type="text"/> | <input type="text"/>  | <input type="text"/> |
| Event 10 | <input type="text"/> | <input type="text"/> | <input type="text"/>  | <input type="text"/> |

If the horse have participated to more than 10 events,within the last three months, please, fill the ten last events,and specify the total number of events here.

Multidrug resistance Horses Owner

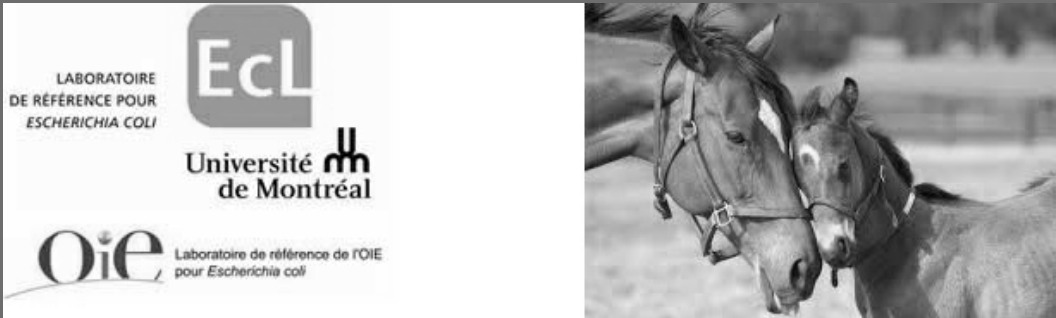

Managment of the horse

If the horse was not sampled in his usual stable, please answer the question concerning the usual stable.



**The following questions concerns the most frequent way, at the time of the sampling.**

**21. Your horse is housed**

- ☐ in an individual loose box
- ☐ in a stabling
- ☐ tied in a stall
- ☐ in a pasture
- ☐ Other, specify

**22. If your horse has access to a pen, but does not live in a pasture, specify the frequency**

- ☐ Once a day
- ☐ Several times a week
- ☐ Once a week and less

**23. If your horse has acces to a pen, but does not live in a pasture, specify the other animals he is in contact with in the pen**

- ☐ Other horses
- ☐ Alone (my horse is the only one to have access to this pen)
- ☐ Alone (but other horses have access to this pen)
- ☐ With other animals, specify the species

**24. Your horse's bedding is**

- ☐ Straw
- ☐ Shavings
- ☐ Pasture (no specific bedding)
- ☐ Other, specify

25. Did you use methods or products to control the vermin in your stable, within the last three month?

- ☐ no
- ☐ yes, we have cats
- ☐ yes, specify the type of product, or if you do not know, write "I don't know".

26. Your horse is housed :

- ☐ alone
- ☐ With other horses (possibility of direct contact)
- ☐ With other animals (possibility of direct contact), please specify the species

27. Your horse's housing is cleaned (at least withdrawal of the manure)

- ☐ twice a day
- ☐ once a day
- ☐ several times a week
- ☐ once a week
- ☐ less than once a week
- ☐ my horse is in a pasture that is not cleaned
- ☐ other, specify

28. Your horse eats hay

- ☐ yes
- ☐ no

29. Your horse eats stock feed

- ☐ no
- ☐ yes, please specify the type, if you know it, otherwise write I do not know

30. Your horse has access to water (indicate the most common water source in each situation, answer only when it is relevant)

|                                                 | Automatic drinking trough | Bucket               | Environmental water source |
|-------------------------------------------------|---------------------------|----------------------|----------------------------|
| In his usual housing                            | <input type="text"/>      | <input type="text"/> | <input type="text"/>       |
| In his pen (if he does not live in his pasture) | <input type="text"/>      | <input type="text"/> | <input type="text"/>       |

31. Did your horse's feed was modified within the last three months?

- ☐ No
- ☐ Stock feed modification
- ☐ Hay modification
- ☐ Other, please specify the type of modification (i.e :complement addition)

32. How many times does your horse work (here work is defined by either ridden, lunged or harnessed)

- ☐ Does not work
- ☐ less than once a week
- ☐ Once a week
- ☐ Several times a week

33. Did you horse was transported within the last three months

- ☐ yes
- ☐ no
- ☐ I do not know

34. If yes, please specify the location (zip code) where the horse was transported, the date (number of days between transportation and sampling), and the time of transport in minutes

Transport 1 (location zip code)

Transport 1 (number of days between transportation and sampling)

Transport 1 (time of transport in minutes)

|                                                                  |                      |
|------------------------------------------------------------------|----------------------|
| Transport 2 (location zip code)                                  | <input type="text"/> |
| Transport 2 (number of days between transportation and sampling) | <input type="text"/> |
| Transport 2 (time of transport in minutes)                       | <input type="text"/> |
| Transport 3 (location zip code)                                  | <input type="text"/> |
| Transport 3 (number of days between transportation and sampling) | <input type="text"/> |
| Transport 3 (time of transport in minutes)                       | <input type="text"/> |
| Transport 4 (location zip code)                                  | <input type="text"/> |
| Transport 4 (number of days between transportation and sampling) | <input type="text"/> |
| Transport 4 (time of transport in minutes)                       | <input type="text"/> |
| Transport 5 (location zip code)                                  | <input type="text"/> |
| Transport 5 (number of days between transportation and sampling) | <input type="text"/> |
| Transport 5 (time of transport in minutes)                       | <input type="text"/> |
| Transport 6 (location zip code)                                  | <input type="text"/> |
| Transport 6 (number of days between transportation and sampling) | <input type="text"/> |
| Transport 6 (time of transport in minutes)                       | <input type="text"/> |
| Transport 7 (location zip code)                                  | <input type="text"/> |
| Transport 7 (number of days between transportation and sampling) | <input type="text"/> |

|                                                                                                                                                                                                            |                      |
|------------------------------------------------------------------------------------------------------------------------------------------------------------------------------------------------------------|----------------------|
| Transport 7 (time of transport in minutes)                                                                                                                                                                 | <input type="text"/> |
| Transport 8 (location zip code)                                                                                                                                                                            | <input type="text"/> |
| Transport 8 (number of days between transportation and sampling)                                                                                                                                           | <input type="text"/> |
| Transport 8 (time of transport in minutes)                                                                                                                                                                 | <input type="text"/> |
| Transport 9 (location zip code)                                                                                                                                                                            | <input type="text"/> |
| Transport 9 (number of days between transportation and sampling)                                                                                                                                           | <input type="text"/> |
| Transport 9 (time of transport in minutes)                                                                                                                                                                 | <input type="text"/> |
| Transport 10 (location zip code)                                                                                                                                                                           | <input type="text"/> |
| Transport 10 (number of days between transportation and sampling)                                                                                                                                          | <input type="text"/> |
| Transport 10 (time of transport in minutes)                                                                                                                                                                | <input type="text"/> |
| <p>If your horse was transported more than ten times within the last three months, please give the informations for the last ten trips, and write the number total of trip here :</p> <input type="text"/> |                      |

35. How many poeple handle your horse (handle is defined as having direct contact more than once a week)

- ☐ 1 person
- ☐ Between 1 et 5 persons
- ☐ More than 5 persons

36. How many animals are housed in the same facility (facility is the stable or farm, not the building) that your horse?

|          | Number               |
|----------|----------------------|
| Horses   | <input type="text"/> |
| Donkeys  | <input type="text"/> |
| Cows     | <input type="text"/> |
| Sheeps   | <input type="text"/> |
| Goats    | <input type="text"/> |
| Pigs     | <input type="text"/> |
| Poultry  | <input type="text"/> |
| Dogs     | <input type="text"/> |
| Cats     | <input type="text"/> |
| Camelids | <input type="text"/> |
| Other    | <input type="text"/> |

37. Have some of these animals been treated with antimicrobials within the last three months?

- ☐ yes
- ☐ no
- ☐ I don't know

38. If you answered yes to the question 37, please specify the treatment if possible

Antimicrobial 1, species  
and number of treated  
animal

Antimicrobial 1,  
administration route (oral,  
intramuscular)

Antimicrobial 1, dosage

Antimicrobial 1, treatment  
duration (if known)

Antimicrobial 2, species  
and number of treated  
animal

Antimicrobial 2,  
administration route (oral,  
intramuscular)

Antimicrobial 2, dosage

Antimicrobial 2, treatment  
duration (if known)

Antimicrobial 3, species  
and number of treated  
animal

Antimicrobial 3,  
administration route (oral,  
intramuscular)

Antimicrobial 3, dosage

Antimicrobial 3, treatment  
duration (if known)

If more than 3  
antimicrobials have been  
used, please specify the  
rest of the information here

I do not know

39. Have your horse been in contact (direct or housed in the same facility) with a hospitalised animal?

☐ yes

☐ no

☐ I do not know

40. If you answered yes to the question 39, please specify the species

|               | number               | Contact type         |
|---------------|----------------------|----------------------|
| Horse         | <input type="text"/> | <input type="text"/> |
| Donkey        | <input type="text"/> | <input type="text"/> |
| Cow           | <input type="text"/> | <input type="text"/> |
| Sheep         | <input type="text"/> | <input type="text"/> |
| Goat          | <input type="text"/> | <input type="text"/> |
| Pig           | <input type="text"/> | <input type="text"/> |
| Poultry       | <input type="text"/> | <input type="text"/> |
| Dog           | <input type="text"/> | <input type="text"/> |
| Cat           | <input type="text"/> | <input type="text"/> |
| Camelids      | <input type="text"/> | <input type="text"/> |
| I do not know | <input type="text"/> | <input type="text"/> |

Other, please specify the species, the number and the contact

## Multidrug resistance Horses Owner

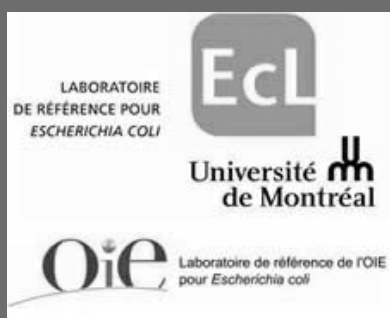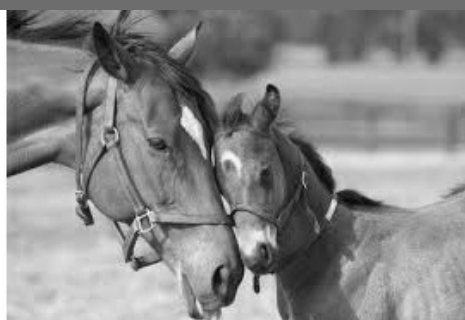

Preventive medicine

The questions concerns the last three months.  
Keep going, the questionnaire is almost done!!!



41. Have your horse had vet care (other than vaccination, dental care and deworming) in the last three months?

- ☐ yes
- ☐ no
- ☐ I do not know

42. Is your horse vaccinated against the following?

|                                       | Answer               | Date                 |
|---------------------------------------|----------------------|----------------------|
| Tetanus                               | <input type="text"/> | <input type="text"/> |
| Rabies                                | <input type="text"/> | <input type="text"/> |
| Herpes (= EHV1 EHV4 = Rhinopneumonia) | <input type="text"/> | <input type="text"/> |
| Influenza (= flu)                     | <input type="text"/> | <input type="text"/> |
| West Nile                             | <input type="text"/> | <input type="text"/> |
| Encéphalitis                          | <input type="text"/> | <input type="text"/> |
| Potomac horse fever                   | <input type="text"/> | <input type="text"/> |
| Strangles                             | <input type="text"/> | <input type="text"/> |
| Botulism                              | <input type="text"/> | <input type="text"/> |

Other, please specify the vaccine and the date if possible

43. When was your horse dewormed for the last time

- ☐ not dewormed
- ☐ Less than a month ago
- ☐ between one and three months ago
- ☐ more than three months ago
- ☐ I do not know

44. If your horse was dewormed, specify the product used the last time if possible

- ☐ Exodus Paste
- ☐ Panacur
- ☐ Pipérazine 34
- ☐ Strongid
- ☐ Super Pip-Zine
- ☐ Worm Clear
- ☐ Quest
- ☐ Quest plus
- ☐ Anthelicide Eq
- ☐ I do not know
- ☐ Other, please specify

45. Has your horse had medical treatment (not prescribed by a vet), within the last three months?

- ☐ yes
- ☐ no
- ☐ I do not know

46. If you answered yes to question 48, please specify the treatment

Antimicrobial 1 (name molecule or brand name)

Antimicrobial 1 (Administration route orally intramuscular)

Antimicrobial 1 (doses)

Antimicrobial 1 (treatment duration)

Antimicrobial 2 (name molecule or brand name)

Antimicrobial 2 (Administration route orally intramuscular)

Antimicrobial 2 (doses)

Antimicrobial 2 (treatment duration)

Other medication 1 (name molecule or brand name)

Other medication 1 (Administration route orally intramuscular)

Other medication 1 (doses)

Other medication 1 (treatment duration)

Other medication 2 (name molecule or brand name)

Other medication 2 (Administration route orally intramuscular)

Other medication 2 (doses)

Other medication 2 (treatment duration)

if more medications have been used, please specify here

I do not know

47. Did your horse get dental care within the last three months

☐ yes

☐ no

☐ I do not know
